# Supplementary material
Source: publisher figshare collection journal article supplement (https://gsajournals.figshare.com/ndownloader/files/23777582)
Supplement: Supplementary file 1 [file 23777582]

## Sheet: RS LOH Details
Table S5. Distribution of 942 LOH tracts in the 100th bottleneck of S/R hybrid. LOH tracts supported by two or more SNPs.
Line	Chromosome position	Track size (bp)	Fixation	Centromere distance (bp)	Telomere distance (bp)	Telomere (L/R)
S/R_1	chr1:30230-30802	572	S288c	120722	29429	Left
S/R_1	chr1:180820-180833	13	S288c	29296	48578	Right
S/R_1	chr1:183461-183590.5	129.5	S288c	31937	45820.5	Right
S/R_1	chr1:197816-197849	33	S288c	46292	31562	Right
S/R_1	chr1:198656-200769	2113	S288c	47132	28642	Right
S/R_1	chr5:7055-7152	97	S288c	144894	582	Left
S/R_1	chr5:549608-549661	53	RM11	397562	19938	Right
S/R_1	chr6:167664.5-167779	114.5	RM11	19096.5	101952	Right
S/R_1	chr7:12316-12416	100	S288c	484563	11535	Left
S/R_1	chr7:18267-18644.5	377.5	S288c	478334	17486	Left
S/R_1	chr7:115012.5-115358.5	346	S288c	381620	114232	Left
S/R_1	chr7:882549.5-882617.5	68	S288c	385570	201018	Right
S/R_1	chr7:1063358.5-1063459.5	101	RM11	566380	20175.5	Right
S/R_1	chr8:93643.5-93797	153.5	S288c	11847	88138.5	Left
S/R_1	chr8:193024-193179.5	155.5	S288c	87380	187519	Left
S/R_1	chr9:33388-33485.5	97.5	S288c	322202	25604	Left
S/R_1	chr10:539386-539531.5	145.5	S288c	103020	205370	Right
S/R_1	chr12:475551-607868	132317	S288c	324663	456413	Right
S/R_1	chr12:607960.5-723016	115056	S288c	457072	341265	Right
S/R_1	chr12:723304.5-759189	35884.5	S288c	572416	305092	Right
S/R_1	chr12:759353-1059567.5	300214	S288c	608465	4713.5	Right
S/R_1	chr13:132640-132737.5	97.5	S288c	135352	126296	Left
S/R_1	chr13:183568-190213	6645	S288c	77877	177224	Left
S/R_1	chr14:749488-751464.5	1976.5	S288c	120672	31813.5	Right
S/R_1	chr15:43030.5-43185	154.5	S288c	283458	42183.5	Left
S/R_1	chr15:117599-120704	3105	S288c	205939	116752	Left
S/R_1	chr15:384753.5-384891.5	138	S288c	58110.5	383906	Left
S/R_2	chr1:29051-29398.5	347.5	S288c	122126	28250	Left
S/R_2	chr1:65479.5-65730.5	251	S288c	85793.5	64678.5	Left
S/R_2	chr1:176784-176903	119	S288c	25260	52508	Right
S/R_2	chr1:180711.5-180767	55.5	S288c	29187.5	48644	Right
S/R_2	chr1:183461-183623	162	S288c	31937	45788	Right
S/R_2	chr1:198269-198309	40	S288c	46745	31102	Right
S/R_2	chr2:75008.5-75333.5	325	RM11	162932	68400.5	Left
S/R_2	chr2:256596-257185.5	589.5	S288c	18331	249988	Left
S/R_2	chr2:332405.5-332437	31.5	RM11	94140.5	325798	Left
S/R_2	chr2:394799.5-395166.5	367	S288c	156534	388192	Left
S/R_2	chr2:417843-418015	172	S288c	179578	394364	Right
S/R_2	chr2:462394.5-462676	281.5	RM11	224130	349703	Right
S/R_2	chr2:478272-479347	1075	S288c	240007	333032	Right
S/R_2	chr2:498609.5-498739.5	130	S288c	260344	313640	Right
S/R_2	chr2:539015.5-539445	429.5	RM11	300750	272934	Right
S/R_2	chr2:562949-563259	310	S288c	324684	249120	Right
S/R_2	chr2:573730.5-573812.5	82	RM11	335466	238566	Right
S/R_2	chr2:675175-675221	46	S288c	436910	137158	Right
S/R_2	chr2:807336-809636	2300	S288c	569071	2743	Right
S/R_2	chr3:203364-236879	33515	RM11	88921	78904	Right
S/R_2	chr3:237061.5-260989.5	23928	RM11	122618	54793.5	Right
S/R_2	chr3:262209-264622	2413	RM11	147766	51161	Right
S/R_2	chr3:264771-304463.5	39692.5	RM11	150328	11319.5	Right
S/R_2	chr3:306568-315795	9227	RM11	192125	0	Right
S/R_2	chr4:212493-212897	404	S288c	236869	211589	Left
S/R_2	chr4:370842.5-371016.5	174	RM11	78749.5	369938	Left
S/R_2	chr4:386033-387466	1433	S288c	62300	385129	Left
S/R_2	chr4:507335-507648	313	RM11	57569	506431	Left
S/R_2	chr4:532647.5-538052.5	5405	S288c	82881.5	531744	Left
S/R_2	chr4:1256795-1258389	1594	RM11	807029	266236	Right
S/R_2	chr4:1447403-1447620	217	S288c	997637	77005	Right
S/R_2	chr4:1487292.5-1487683	390.5	S288c	1.03753e+06	36942	Right
S/R_2	chr4:1519606.5-1519734	127.5	RM11	1.06984e+06	4891	Right
S/R_2	chr5:225366-225583.5	217.5	S288c	73320	218893	Left
S/R_2	chr5:491967.5-495340	3372.5	RM11	339922	74259	Right
S/R_2	chr5:520732-520961	229	RM11	368686	48638	Right
S/R_2	chr6:19895-19981	86	S288c	128587	14365	Left
S/R_2	chr6:52936.5-53533	596.5	RM11	95035	47406.5	Left
S/R_2	chr6:75766-76221.5	455.5	S288c	72346.5	70236	Left
S/R_2	chr6:98661-98766	105	S288c	49802	93131	Left
S/R_2	chr6:158212-158313.5	101.5	S288c	9644	111418	Right
S/R_2	chr6:192036.5-192069.5	33	S288c	43468.5	77661.5	Right
S/R_2	chr7:10328-10883.5	555.5	S288c	486096	9547	Left
S/R_2	chr7:17859-17925	66	S288c	479054	17078	Left
S/R_2	chr7:17925-18015.5	90.5	RM11	478964	17144	Left
S/R_2	chr7:19462-19505.5	43.5	S288c	477474	18681	Left
S/R_2	chr7:45173.5-45385	211.5	RM11	451594	44392.5	Left
S/R_2	chr7:89112-89891.5	779.5	RM11	407088	88331	Left
S/R_2	chr7:145274-145658	384	S288c	351321	144493	Left
S/R_2	chr7:203840-204049.5	209.5	RM11	292930	203059	Left
S/R_2	chr7:205863-206700.5	837.5	RM11	290278	205082	Left
S/R_2	chr7:395842-395950	108	S288c	101029	395061	Left
S/R_2	chr7:431290-431674	384	S288c	65305	430509	Left
S/R_2	chr7:459536.5-459817	280.5	S288c	37162	458756	Left
S/R_2	chr7:485692-485899.5	207.5	S288c	11079.5	484911	Left
S/R_2	chr7:544945-545066	121	RM11	47966	538569	Right
S/R_2	chr7:568081.5-568193.5	112	S288c	71102.5	515442	Right
S/R_2	chr7:808415-808554	139	S288c	311436	275081	Right
S/R_2	chr7:882333-882429.5	96.5	S288c	385354	201206	Right
S/R_2	chr7:882899.5-883148	248.5	S288c	385920	200487	Right
S/R_2	chr7:939497.5-939897.5	400	RM11	442518	143738	Right
S/R_2	chr7:999540.5-999625.5	85	S288c	502562	84009.5	Right
S/R_2	chr7:1050119.5-1050248	128.5	S288c	553140	33387	Right
S/R_2	chr7:1051279-1051686	407	RM11	554300	31949	Right
S/R_2	chr8:93708.5-93797	88.5	S288c	11847	88203.5	Left
S/R_2	chr8:134468-134715.5	247.5	RM11	28824	128963	Left
S/R_2	chr8:150457-150599.5	142.5	RM11	44813	144952	Left
S/R_2	chr8:396890.5-397396	505.5	RM11	291246	158709	Right
S/R_2	chr9:27057-27186.5	129.5	S288c	328500	19273	Left
S/R_2	chr9:39308.5-39448.5	140	RM11	316238	31524.5	Left
S/R_2	chr9:51437.5-51671	233.5	S288c	304016	43653.5	Left
S/R_2	chr9:69526.5-69707.5	181	RM11	285980	61742.5	Left
S/R_2	chr9:98330-98518.5	188.5	RM11	257168	90546	Left
S/R_2	chr9:138978-139237.5	259.5	S288c	216450	131194	Left
S/R_2	chr9:387073-387169	96	S288c	31386	51899	Right
S/R_2	chr10:25133-25460.5	327.5	S288c	410906	17366	Left
S/R_2	chr10:67492.5-67761	268.5	RM11	368605	59725.5	Left
S/R_2	chr10:189033-189284.5	251.5	S288c	247082	181266	Left
S/R_2	chr10:641127.5-641959.5	832	S288c	204762	102942	Right
S/R_2	chr11:7296-7657.5	361.5	RM11	432530	6489	Left
S/R_2	chr11:12589-12664	75	S288c	427524	11782	Left
S/R_2	chr11:21286.5-21468.5	182	RM11	418720	20479.5	Left
S/R_2	chr11:92235.5-92344	108.5	S288c	347844	91428.5	Left
S/R_2	chr11:98249.5-98373.5	124	S288c	341814	97442.5	Left
S/R_2	chr11:260933.5-261015	81.5	RM11	179173	260126	Left
S/R_2	chr11:355140.5-355230	89.5	S288c	84958	310674	Right
S/R_2	chr11:383272.5-383887	614.5	S288c	56301	282017	Right
S/R_2	chr11:390972-391436.5	464.5	RM11	48751.5	274468	Right
S/R_2	chr11:392581.5-392762	180.5	S288c	47426	273142	Right
S/R_2	chr11:431530.5-431658.5	128	S288c	8529.5	234246	Right
S/R_2	chr11:516878.5-517208.5	330	S288c	76690.5	148696	Right
S/R_2	chr11:645081.5-645162	80.5	RM11	204894	20742	Right
S/R_2	chr12:92330.5-92514.5	184	S288c	58373.5	80245.5	Left
S/R_2	chr12:95777-96687	910	S288c	54201	83692	Left
S/R_2	chr12:122240-122524.5	284.5	RM11	28363.5	110155	Left
S/R_2	chr12:195580.5-196920	1339.5	S288c	44692.5	183496	Left
S/R_2	chr12:243534-243800	266	S288c	92646	231449	Left
S/R_2	chr12:250642.5-250801	158.5	RM11	99754.5	238558	Left
S/R_2	chr12:283725.5-283770	44.5	S288c	132838	271640	Left
S/R_2	chr12:530467.5-530711	243.5	RM11	379580	518382	Left
S/R_2	chr12:636476.5-636941.5	465	RM11	485588	427340	Right
S/R_2	chr12:673192.5-673444	251.5	RM11	522304	390837	Right
S/R_2	chr12:674705-674829	124	RM11	523817	389452	Right
S/R_2	chr12:718061-718378.5	317.5	S288c	567173	345902	Right
S/R_2	chr12:723304.5-723348.5	44	RM11	572416	340932	Right
S/R_2	chr12:729590-730323.5	733.5	RM11	578702	333958	Right
S/R_2	chr12:762331.5-762654.5	323	S288c	611444	301626	Right
S/R_2	chr12:806993.5-807097	103.5	S288c	656106	257184	Right
S/R_2	chr12:830661-830683.5	22.5	S288c	679773	233598	Right
S/R_2	chr12:949892.5-950910	1017.5	S288c	799004	113371	Right
S/R_2	chr13:55677.5-56017	339.5	S288c	212073	49333.5	Left
S/R_2	chr13:61265-61412	147	RM11	206678	54921	Left
S/R_2	chr13:162820.5-162892.5	72	S288c	105198	156476	Left
S/R_2	chr13:234591.5-234833.5	242	S288c	33256.5	228248	Left
S/R_2	chr13:372083-372164	81	RM11	103993	365739	Left
S/R_2	chr13:379702.5-379804	101.5	S288c	111612	373358	Left
S/R_2	chr13:514268.5-514595.5	327	S288c	246178	408946	Right
S/R_2	chr13:587635-587827	192	RM11	319545	335714	Right
S/R_2	chr13:628738-628901.5	163.5	RM11	360648	294640	Right
S/R_2	chr13:665270.5-665854.5	584	RM11	397180	257686	Right
S/R_2	chr13:814524.5-816415	1890.5	RM11	546434	107126	Right
S/R_2	chr13:892566.5-892695.5	129	RM11	624476	30845.5	Right
S/R_2	chr14:664059.5-666156.5	2097	RM11	35243.5	117122	Right
S/R_2	chr15:39366.5-39392	25.5	S288c	287251	38519.5	Left
S/R_2	chr15:55319.5-55339.5	20	S288c	271304	54472.5	Left
S/R_2	chr15:94771.5-95101.5	330	S288c	231542	93924.5	Left
S/R_2	chr15:145084-145320.5	236.5	RM11	181322	144237	Left
S/R_2	chr15:384988.5-385050	61.5	S288c	58345.5	384142	Left
S/R_2	chr15:487318.5-487464	145.5	S288c	160676	486472	Left
S/R_2	chr15:514994-515085.5	91.5	S288c	188351	514147	Left
S/R_2	chr15:515101.5-515191.5	90	S288c	188458	514254	Left
S/R_2	chr15:566281.5-566401.5	120	S288c	239638	517520	Right
S/R_2	chr15:1072211-1073143	932	S288c	745568	10779	Right
S/R_2	chr16:99240-99331	91	S288c	456684	92017	Left
S/R_2	chr16:357043.5-357900	856.5	RM11	198115	349820	Left
S/R_2	chr16:511603-511667.5	64.5	S288c	44347.5	430728	Right
S/R_2	chr16:836993.5-839150.5	2157	S288c	280978	103246	Right
S/R_2	chr16:921710-921792	82	S288c	365695	20604	Right
S/R_3	chr1:29051-29398.5	347.5	S288c	122126	28250	Left
S/R_3	chr1:30230-30916	686	S288c	120608	29429	Left
S/R_3	chr1:52789.5-52898.5	109	RM11	98625.5	51988.5	Left
S/R_3	chr1:75301-76806	1505	S288c	74718	74500	Left
S/R_3	chr1:153923-154209	286	RM11	2399	75202	Right
S/R_3	chr1:182171-182377.5	206.5	RM11	30647	47033.5	Right
S/R_3	chr1:182377.5-182809.5	432	S288c	30853.5	46601.5	Right
S/R_3	chr1:198452-198586.5	134.5	S288c	46928	30824.5	Right
S/R_3	chr1:203886-203998	112	S288c	52362	25413	Right
S/R_3	chr2:238124-238206.5	82.5	S288c	58.5	231516	Left
S/R_3	chr2:238206.5-238371.5	165	RM11	0	231598	Left
S/R_3	chr2:256596-257185.5	589.5	S288c	18331	249988	Left
S/R_3	chr2:353621-353631	10	S288c	115356	347013	Left
S/R_3	chr2:361558-361875.5	317.5	S288c	123293	354950	Left
S/R_3	chr2:367465.5-367517	51.5	RM11	129200	360858	Left
S/R_3	chr2:417843-417993.5	150.5	S288c	179578	394386	Right
S/R_3	chr2:469611.5-471972	2360.5	RM11	231346	340407	Right
S/R_3	chr2:520494.5-520602.5	108	S288c	282230	291776	Right
S/R_3	chr2:538908-539281.5	373.5	RM11	300643	273098	Right
S/R_3	chr2:564593-564896	303	RM11	326328	247483	Right
S/R_3	chr2:586177-586401.5	224.5	RM11	347912	225978	Right
S/R_3	chr2:622722-622929.5	207.5	RM11	384457	189450	Right
S/R_3	chr3:36042.5-38164	2121.5	S288c	76279	34944.5	Left
S/R_3	chr3:101039.5-101341	301.5	S288c	13102	99941.5	Left
S/R_3	chr3:227040-227716	676	S288c	112597	88067	Right
S/R_3	chr3:242329-242530.5	201.5	RM11	127886	73252.5	Right
S/R_3	chr4:45715.5-46740	1024.5	S288c	403026	44811.5	Left
S/R_3	chr4:89225-90806.5	1581.5	S288c	358960	88321	Left
S/R_3	chr4:436094-436369.5	275.5	S288c	13396.5	435190	Left
S/R_3	chr4:532647.5-538001.5	5354	RM11	82881.5	531744	Left
S/R_3	chr4:975064.5-975204	139.5	S288c	525298	549421	Right
S/R_3	chr4:1057669.5-1058034.5	365	RM11	607904	466590	Right
S/R_3	chr4:1451091.5-1451204	112.5	S288c	1.00133e+06	73421	Right
S/R_3	chr4:1485520-1485633	113	S288c	1035754	38992	Right
S/R_3	chr4:1517434-1517795.5	361.5	S288c	1067668	6829.5	Right
S/R_3	chr5:25073-25113	40	S288c	126933	18600	Left
S/R_3	chr5:58846.5-59529.5	683	S288c	92516.5	52373.5	Left
S/R_3	chr5:73507-73635	128	S288c	78411	67034	Left
S/R_3	chr5:212411.5-212470.5	59	RM11	60365.5	205938	Left
S/R_3	chr5:225366-225583.5	217.5	RM11	73320	218893	Left
S/R_3	chr5:270131-270349.5	218.5	S288c	118085	263658	Left
S/R_3	chr5:419473-419961.5	488.5	RM11	267427	149638	Right
S/R_3	chr5:520855-521063	208	S288c	368809	48536	Right
S/R_3	chr6:31466-31563.5	97.5	S288c	117004	25936	Left
S/R_3	chr6:42436.5-42728	291.5	RM11	105840	36906.5	Left
S/R_3	chr6:98851-99306.5	455.5	S288c	49261.5	93321	Left
S/R_3	chr6:148559.5-149288.5	729	S288c	0	120442	Right
S/R_3	chr6:167733-167942	209	S288c	19165	101789	Right
S/R_3	chr7:11663-12088.5	425.5	S288c	484890	10882	Left
S/R_3	chr7:17199.5-17250	50.5	S288c	479729	16418.5	Left
S/R_3	chr7:17983-18070	87	RM11	478909	17202	Left
S/R_3	chr7:203901-204049.5	148.5	S288c	292930	203120	Left
S/R_3	chr7:431290-431674	384	S288c	65305	430509	Left
S/R_3	chr7:440832.5-441636.5	804	RM11	55342.5	440052	Left
S/R_3	chr7:459722-459817	95	RM11	37162	458941	Left
S/R_3	chr7:634598.5-636537	1938.5	S288c	137620	447098	Right
S/R_3	chr7:794555.5-794729	173.5	S288c	297576	288906	Right
S/R_3	chr7:808415-808554	139	S288c	311436	275081	Right
S/R_3	chr7:882581-882617.5	36.5	S288c	385602	201018	Right
S/R_3	chr7:995320.5-995449	128.5	S288c	498342	88186	Right
S/R_3	chr7:1073803.5-1074011	207.5	RM11	576824	9624	Right
S/R_3	chr8:6331-12797	6466	S288c	92847	826	Left
S/R_3	chr8:32637-32982	345	S288c	72662	27132	Left
S/R_3	chr8:64259-64398.5	139.5	RM11	41245.5	58754	Left
S/R_3	chr8:78618-78894.5	276.5	S288c	26749.5	73113	Left
S/R_3	chr8:93643.5-93797	153.5	S288c	11847	88138.5	Left
S/R_3	chr8:108242.5-108499.5	257	S288c	2598.5	102738	Left
S/R_3	chr8:133623.5-133892.5	269	S288c	27979.5	128118	Left
S/R_3	chr8:157459.5-157556.5	97	RM11	51815.5	151954	Left
S/R_3	chr8:261026.5-262171	1144.5	RM11	155382	255522	Left
S/R_3	chr8:454639-456040.5	1401.5	RM11	348995	100064	Right
S/R_3	chr8:472055-474503	2448	S288c	366411	81602	Right
S/R_3	chr9:33388-33485.5	97.5	S288c	322202	25604	Left
S/R_3	chr9:33622-33675.5	53.5	RM11	322012	25838	Left
S/R_3	chr9:79804-79921	117	RM11	275766	72020	Left
S/R_3	chr9:247455.5-247539.5	84	S288c	108148	191528	Right
S/R_3	chr9:387073-387169	96	RM11	31386	51899	Right
S/R_3	chr9:389125-389190	65	S288c	33438	49878	Right
S/R_3	chr9:402200.5-402417.5	217	S288c	46513.5	36650.5	Right
S/R_3	chr10:39957-40173	216	RM11	396193	32190	Left
S/R_3	chr10:67492.5-67761	268.5	S288c	368605	59725.5	Left
S/R_3	chr10:113564-113822	258	RM11	322544	105797	Left
S/R_3	chr10:358099-358199	100	S288c	78167	350332	Left
S/R_3	chr10:366764-367425	661	S288c	68941	358997	Left
S/R_3	chr10:412548-423816	11268	RM11	12550	321086	Right
S/R_3	chr11:15988.5-16283	294.5	RM11	423905	15181.5	Left
S/R_3	chr11:19324.5-19469	144.5	RM11	420719	18517.5	Left
S/R_3	chr11:66995-68000.5	1005.5	S288c	372188	66188	Left
S/R_3	chr11:232703-232815.5	112.5	S288c	207372	231896	Left
S/R_3	chr11:316218-316292	74	S288c	123896	315411	Left
S/R_3	chr11:355140.5-355206	65.5	S288c	84982	310698	Right
S/R_3	chr11:379884-380654.5	770.5	S288c	59533.5	285250	Right
S/R_3	chr11:388999-389120.5	121.5	S288c	51067.5	276784	Right
S/R_3	chr11:516878.5-517208.5	330	RM11	76690.5	148696	Right
S/R_3	chr11:578852-578923	71	S288c	138664	86981	Right
S/R_3	chr11:612363.5-612569	205.5	S288c	172176	53335	Right
S/R_3	chr11:613599.5-613721	121.5	S288c	173412	52183	Right
S/R_3	chr11:620556-621007	451	S288c	180368	44897	Right
S/R_3	chr11:621472.5-621604	131.5	S288c	181284	44300	Right
S/R_3	chr11:645081.5-645162	80.5	RM11	204894	20742	Right
S/R_3	chr12:19915-20135.5	220.5	S288c	130752	7830	Left
S/R_3	chr12:25256-25452	196	S288c	125436	13171	Left
S/R_3	chr12:65479-65609	130	RM11	85279	53394	Left
S/R_3	chr12:80534-81564.5	1030.5	S288c	69323.5	68449	Left
S/R_3	chr12:612078-612220	142	RM11	461190	452061	Right
S/R_3	chr12:694264.5-694601.5	337	S288c	543376	369680	Right
S/R_3	chr12:754347-754520	173	S288c	603459	309761	Right
S/R_3	chr12:797967.5-798005	37.5	S288c	647080	266276	Right
S/R_3	chr12:806830.5-806964	133.5	S288c	655942	257317	Right
S/R_3	chr12:807144.5-807408	263.5	S288c	656256	256873	Right
S/R_3	chr12:817857-817955.5	98.5	S288c	666969	246326	Right
S/R_3	chr12:903423.5-903839.5	416	RM11	752536	160442	Right
S/R_3	chr12:919534-919691	157	S288c	768646	144590	Right
S/R_3	chr12:961661-961682	21	RM11	810773	102599	Right
S/R_3	chr13:85044-89440.5	4396.5	RM11	178650	78700	Left
S/R_3	chr13:97481.5-97628	146.5	S288c	170462	91137.5	Left
S/R_3	chr13:137032-137229	197	S288c	130861	130688	Left
S/R_3	chr13:183568-183850	282	S288c	84240	177224	Left
S/R_3	chr13:272619-272799	180	S288c	4529	266275	Left
S/R_3	chr13:371984-372037	53	S288c	103894	365640	Left
S/R_3	chr13:506181.5-506277.5	96	S288c	238092	417264	Right
S/R_3	chr13:514060.5-514595.5	535	S288c	245970	408946	Right
S/R_3	chr13:597401.5-597817.5	416	S288c	329312	325724	Right
S/R_3	chr13:874213.5-874235.5	22	S288c	606124	49305.5	Right
S/R_3	chr13:892395-892695.5	300.5	RM11	624305	30845.5	Right
S/R_3	chr14:64411-64742	331	S288c	564074	56983	Left
S/R_3	chr14:724703.5-726870	2166.5	S288c	95887.5	56408	Right
S/R_3	chr14:749488-751464.5	1976.5	S288c	120672	31813.5	Right
S/R_3	chr15:12910-12992.5	82.5	RM11	313650	12063	Left
S/R_3	chr15:18923-18999.5	76.5	RM11	307644	18076	Left
S/R_3	chr15:35692-35890.5	198.5	S288c	290752	34845	Left
S/R_3	chr15:39275.5-39392	116.5	S288c	287251	38428.5	Left
S/R_3	chr15:53189-53320	131	S288c	273323	52342	Left
S/R_3	chr15:129175.5-129508	332.5	RM11	197135	128328	Left
S/R_3	chr15:145084-145306	222	S288c	181337	144237	Left
S/R_3	chr15:145877-146299.5	422.5	S288c	180344	145030	Left
S/R_3	chr15:165869.5-165938	68.5	RM11	160705	165022	Left
S/R_3	chr15:302344-304666	2322	RM11	21977	301497	Left
S/R_3	chr15:385518-385678.5	160.5	S288c	58875	384671	Left
S/R_3	chr15:386453-386799.5	346.5	RM11	59810	385606	Left
S/R_3	chr15:448487-448908	421	S288c	121844	447640	Left
S/R_3	chr15:497177-497474.5	297.5	S288c	170534	496330	Left
S/R_3	chr15:572069.5-572254.5	185	RM11	245426	511668	Right
S/R_3	chr15:765628-765782	154	RM11	438985	318140	Right
S/R_3	chr15:830956.5-831515.5	559	RM11	504314	252406	Right
S/R_3	chr15:889568.5-889864.5	296	S288c	562926	194058	Right
S/R_3	chr16:173620.5-173843.5	223	S288c	382172	166398	Left
S/R_3	chr16:180000-181681.5	1681.5	S288c	374334	172777	Left
S/R_3	chr16:436464.5-436473	8.5	S288c	119542	429242	Left
S/R_3	chr16:453390-453577.5	187.5	RM11	102438	446167	Left
S/R_3	chr16:591413-596026	4613	S288c	35398	346370	Right
S/R_4	chr1:75301-76806	1505	S288c	74718	74500	Left
S/R_4	chr1:197785.5-197849	63.5	S288c	46261.5	31562	Right
S/R_4	chr2:353623-354491.5	868.5	RM11	115358	347015	Left
S/R_4	chr4:532647.5-538052.5	5405	S288c	82881.5	531744	Left
S/R_4	chr4:820223.5-822023.5	1800	S288c	370458	702602	Right
S/R_4	chr4:1151295-1151514	219	S288c	701529	373111	Right
S/R_4	chr5:565625.5-569094.5	3469	S288c	413580	504.5	Right
S/R_4	chr7:883107.5-883295	187.5	S288c	386128	200340	Right
S/R_4	chr8:64230-64398.5	168.5	S288c	41245.5	58725	Left
S/R_4	chr8:436872-436996	124	RM11	331228	119109	Right
S/R_4	chr9:247455.5-247539.5	84	S288c	108148	191528	Right
S/R_4	chr9:357057-361577.5	4520.5	S288c	1370	77490.5	Right
S/R_4	chr10:412548-423816	11268	RM11	12550	321086	Right
S/R_4	chr11:355140.5-355230	89.5	S288c	84958	310674	Right
S/R_4	chr11:613634-613721	87	S288c	173446	52183	Right
S/R_4	chr12:25256-25452	196	S288c	125436	13171	Left
S/R_4	chr12:95882.5-96687	804.5	S288c	54201	83797.5	Left
S/R_4	chr13:85044-89440.5	4396.5	RM11	178650	78700	Left
S/R_4	chr14:212831-213093.5	262.5	S288c	415722	205403	Left
S/R_4	chr15:167881-167954	73	S288c	158689	167034	Left
S/R_4	chr15:302344-304666	2322	RM11	21977	301497	Left
S/R_4	chr15:998073.5-1073143	75069.5	RM11	671430	10779	Right
S/R_4	chr15:1073274.5-1075901	2626.5	RM11	746632	8021	Right
S/R_4	chr16:26255-143286	117031	S288c	412729	19032	Left
S/R_4	chr16:154053-157984.5	3931.5	RM11	398030	146830	Left
S/R_4	chr16:436464.5-436473	8.5	S288c	119542	429242	Left
S/R_4	chr16:591413-596026	4613	S288c	35398	346370	Right
S/R_5	chr1:47362-49180.5	1818.5	RM11	102344	46561	Left
S/R_5	chr1:132084.5-148546	16461.5	S288c	2978	80865	Right
S/R_5	chr1:203886-203998	112	S288c	52362	25413	Right
S/R_5	chr4:123426-124033	607	RM11	325733	122522	Left
S/R_5	chr5:7055-7152	97	S288c	144894	582	Left
S/R_5	chr6:243594.5-249765	6170.5	S288c	95026.5	19966	Right
S/R_5	chr7:10079-10272.5	193.5	S288c	486706	9298	Left
S/R_5	chr9:27034.5-27186.5	152	S288c	328500	19250.5	Left
S/R_5	chr9:261662.5-265056	3393.5	S288c	90631	174012	Right
S/R_5	chr10:160246-160337	91	S288c	276029	152479	Left
S/R_5	chr10:646814-647826.5	1012.5	S288c	210448	97075.5	Right
S/R_5	chr11:389077.5-389120.5	43	S288c	51067.5	276784	Right
S/R_5	chr11:613634-613721	87	S288c	173446	52183	Right
S/R_5	chr12:962903.5-963867.5	964	S288c	812016	100414	Right
S/R_5	chr13:4873-26871	21998	S288c	241219	0	Left
S/R_5	chr13:183568-183850	282	S288c	84240	177224	Left
S/R_5	chr14:3761-11609	7848	RM11	617207	0	Left
S/R_5	chr14:602249.5-602255	5.5	S288c	26561	181023	Right
S/R_5	chr15:385150.5-385259.5	109	S288c	58507.5	384304	Left
S/R_5	chr15:482930.5-483855.5	925	RM11	156288	482084	Left
S/R_6	chr1:197443.5-197528.5	85	S288c	45919.5	31882.5	Right
S/R_6	chr1:197726.5-197785.5	59	S288c	46202.5	31625.5	Right
S/R_6	chr1:198634.5-200769	2134.5	S288c	47110.5	28642	Right
S/R_6	chr2:154441-155076.5	635.5	RM11	83188.5	147833	Left
S/R_6	chr2:238206.5-238263	56.5	S288c	2	231598	Left
S/R_6	chr2:562949-563259	310	S288c	324684	249120	Right
S/R_6	chr4:128220-130091.5	1871.5	S288c	319674	127316	Left
S/R_6	chr4:212336.5-212522	185.5	RM11	237244	211432	Left
S/R_6	chr4:385855.5-386033	177.5	S288c	63733	384952	Left
S/R_6	chr4:955421-956282.5	861.5	S288c	505655	568342	Right
S/R_6	chr4:1151295-1151514	219	S288c	701529	373111	Right
S/R_6	chr4:1469038-1469203.5	165.5	S288c	1019272	55421.5	Right
S/R_6	chr5:7055-46235.5	39180.5	RM11	105810	582	Left
S/R_6	chr5:46566-130857	84291	RM11	21189	40093	Left
S/R_6	chr5:563808.5-564103	294.5	S288c	411762	5496	Right
S/R_6	chr6:167384-167516	132	S288c	18816	102215	Right
S/R_6	chr6:209908.5-230544.5	20636	RM11	61340.5	39186.5	Right
S/R_6	chr6:230955.5-235259	4303.5	RM11	82387.5	34472	Right
S/R_6	chr6:235748.5-269961	34212.5	RM11	87180.5	0	Right
S/R_6	chr7:165.5-20358	20192.5	RM11	476621	0	Left
S/R_6	chr7:882597.5-882617.5	20	S288c	385618	201018	Right
S/R_6	chr7:883148-883295	147	S288c	386169	200340	Right
S/R_6	chr7:1068735.5-1068852	116.5	S288c	571756	14783	Right
S/R_6	chr8:64259-64398.5	139.5	S288c	41245.5	58754	Left
S/R_6	chr8:82447-82670.5	223.5	S288c	22973.5	76942	Left
S/R_6	chr8:93002-93332	330	S288c	12312	87497	Left
S/R_6	chr8:154916.5-163159.5	8243	S288c	49272.5	149412	Left
S/R_6	chr8:184045-184214.5	169.5	S288c	78401	178540	Left
S/R_6	chr8:193024-194786.5	1762.5	S288c	87380	187519	Left
S/R_6	chr8:211674-211763	89	RM11	106030	206169	Left
S/R_6	chr9:247414-247539.5	125.5	S288c	108148	191528	Right
S/R_6	chr9:387098.5-387169	70.5	S288c	31411.5	51899	Right
S/R_6	chr11:231578.5-231825.5	247	S288c	208362	230772	Left
S/R_6	chr11:242642.5-242812	169.5	RM11	197376	241836	Left
S/R_6	chr11:355140.5-355206	65.5	S288c	84982	310698	Right
S/R_6	chr11:404041.5-412366	8324.5	S288c	27822	253538	Right
S/R_6	chr11:412545.5-414512	1966.5	S288c	25676	251392	Right
S/R_6	chr11:415199-415336	137	S288c	24852	250568	Right
S/R_6	chr11:415562.5-416121.5	559	S288c	24066.5	249782	Right
S/R_6	chr11:416434.5-445089.5	28655	S288c	0	220814	Right
S/R_6	chr11:446132.5-454116.5	7984	S288c	5944.5	211788	Right
S/R_6	chr11:613634-613721	87	S288c	173446	52183	Right
S/R_6	chr12:95882.5-96687	804.5	S288c	54201	83797.5	Left
S/R_6	chr12:562187.5-565769.5	3582	S288c	411300	498512	Right
S/R_6	chr12:806830.5-806993.5	163	S288c	655942	257288	Right
S/R_6	chr12:818462-818569	107	S288c	667574	245712	Right
S/R_6	chr12:835592-835741.5	149.5	RM11	684704	228540	Right
S/R_6	chr12:1059307.5-1059496	188.5	S288c	908420	4785	Right
S/R_6	chr13:874180-874235.5	55.5	S288c	606090	49305.5	Right
S/R_6	chr14:3761-11609	7848	S288c	617207	0	Left
S/R_6	chr14:393374-393564	190	S288c	235252	385946	Left
S/R_6	chr14:500504-500711	207	S288c	128105	282567	Right
S/R_6	chr14:572484-572562.5	78.5	S288c	56253.5	210716	Right
S/R_6	chr15:132120.5-132200	79.5	RM11	194443	131274	Left
S/R_6	chr15:384628.5-384753.5	125	S288c	57985.5	383782	Left
S/R_6	chr15:888834.5-889055	220.5	RM11	562192	194867	Right
S/R_6	chr16:462097-462241.5	144.5	RM11	93773.5	454874	Left
S/R_7	chr1:29398.5-30230	831.5	S288c	121294	28597.5	Left
S/R_7	chr1:198248-198309	61	S288c	46724	31102	Right
S/R_7	chr1:198548-198586.5	38.5	S288c	47024	30824.5	Right
S/R_7	chr2:75099.5-75333.5	234	S288c	162932	68491.5	Left
S/R_7	chr2:427765.5-427870.5	105	S288c	189500	384508	Right
S/R_7	chr2:790264-793773	3509	S288c	551999	18606	Right
S/R_7	chr4:676327-679508.5	3181.5	S288c	226561	675423	Left
S/R_7	chr4:874935.5-938416.5	63481	RM11	425170	586208	Right
S/R_7	chr4:938812.5-961205.5	22393	RM11	489046	563420	Right
S/R_7	chr4:961397.5-986930	25532.5	RM11	511632	537695	Right
S/R_7	chr4:1474524-1474624.5	100.5	RM11	1024758	50000.5	Right
S/R_7	chr5:13085.5-16638.5	3553	RM11	135408	6612.5	Left
S/R_7	chr6:191786-191978.5	192.5	S288c	43218	77752.5	Right
S/R_7	chr7:11393-11509.5	116.5	S288c	485470	10612	Left
S/R_7	chr7:11729.5-11860	130.5	S288c	485119	10948.5	Left
S/R_7	chr7:151975.5-166088.5	14113	S288c	330890	151194	Left
S/R_7	chr7:166463-172737.5	6274.5	S288c	324242	165682	Left
S/R_7	chr7:1068585.5-1068651.5	66	S288c	571606	14983.5	Right
S/R_7	chr8:525421-525654	233	S288c	419777	30451	Right
S/R_7	chr10:29879-29950.5	71.5	S288c	406416	22112	Left
S/R_7	chr11:278497.5-283459.5	4962	RM11	156728	277690	Left
S/R_7	chr11:645081.5-645162	80.5	S288c	204894	20742	Right
S/R_7	chr12:230319.5-282447	52127.5	RM11	79431.5	218234	Left
S/R_7	chr12:282531-634353.5	351822	RM11	131643	270446	Left
S/R_7	chr12:634548-839752.5	205204	RM11	483660	224528	Right
S/R_7	chr12:839974.5-847830	7855.5	RM11	689086	216451	Right
S/R_7	chr12:848040-859830.5	11790.5	RM11	697152	204450	Right
S/R_7	chr12:860085.5-898164	38078.5	RM11	709198	166117	Right
S/R_7	chr12:898366-964973.5	66607.5	RM11	747478	99307.5	Right
S/R_7	chr12:965131-965318	187	RM11	814243	98963	Right
S/R_7	chr12:965549.5-1026154	60604.5	RM11	814662	38127	Right
S/R_7	chr12:1026225.5-1027519	1293.5	RM11	875338	36762	Right
S/R_7	chr12:1027594-1028821	1227	RM11	876706	35460	Right
S/R_7	chr12:1029001-1030592	1591	RM11	878113	33689	Right
S/R_7	chr12:1031066-1043930	12864	RM11	880178	20351	Right
S/R_7	chr12:1044510-1059567.5	15057.5	RM11	893622	4713.5	Right
S/R_7	chr13:162820.5-162901	80.5	S288c	105189	156476	Left
S/R_7	chr14:16963.5-17073	109.5	S288c	611743	9535.5	Left
S/R_7	chr14:490486.5-494625.5	4139	S288c	134190	288652	Right
S/R_7	chr15:111073-111121.5	48.5	S288c	215522	110226	Left
S/R_7	chr15:385081.5-385259.5	178	S288c	58438.5	384234	Left
S/R_7	chr15:514994-515085.5	91.5	S288c	188351	514147	Left
S/R_7	chr15:517124.5-517576	451.5	RM11	190482	516278	Left
S/R_7	chr15:517643-527410	9767	RM11	191000	516796	Left
S/R_7	chr15:536168.5-536310.5	142	RM11	209526	535322	Left
S/R_7	chr15:1072287.5-1073143	855.5	S288c	745644	10779	Right
S/R_8	chr1:183461-183623	162	S288c	31937	45788	Right
S/R_8	chr2:736173-753834	17661	RM11	497908	58545	Right
S/R_8	chr2:754046.5-754379.5	333	RM11	515782	57999.5	Right
S/R_8	chr2:754606-756769	2163	RM11	516341	55610	Right
S/R_8	chr2:756769-801584	44815	S288c	518504	10795	Right
S/R_8	chr3:127589-131631.5	4042.5	S288c	13146	126491	Left
S/R_8	chr4:220403-220776.5	373.5	S288c	228990	219499	Left
S/R_8	chr4:532647.5-538052.5	5405	S288c	82881.5	531744	Left
S/R_8	chr4:550229-552747	2518	RM11	100463	549325	Left
S/R_8	chr4:834600.5-837434	2833.5	S288c	384834	687191	Right
S/R_8	chr4:1383325-1389902	6577	RM11	933559	134723	Right
S/R_8	chr6:93298-96214	2916	RM11	52354	87768	Left
S/R_8	chr6:191786-191978.5	192.5	S288c	43218	77752.5	Right
S/R_8	chr7:11393-11509.5	116.5	S288c	485470	10612	Left
S/R_8	chr7:115012.5-115358.5	346	S288c	381620	114232	Left
S/R_8	chr7:835037.5-836329	1291.5	S288c	338058	247306	Right
S/R_8	chr7:883148-883295	147	S288c	386169	200340	Right
S/R_8	chr7:1068735.5-1068787	51.5	S288c	571756	14848	Right
S/R_8	chr8:117838-119751	1913	RM11	12194	112333	Left
S/R_8	chr9:27103.5-27123.5	20	S288c	328564	19319.5	Left
S/R_8	chr9:81048.5-82533.5	1485	RM11	273154	73264.5	Left
S/R_8	chr9:425225.5-425299	73.5	S288c	69538.5	13769	Right
S/R_8	chr10:184841-191216	6375	S288c	245150	177074	Left
S/R_8	chr11:64038-64180.5	142.5	S288c	376008	63231	Left
S/R_8	chr11:92235.5-92344	108.5	S288c	347844	91428.5	Left
S/R_8	chr11:475688.5-510990	35301.5	RM11	35500.5	154914	Right
S/R_8	chr11:511136.5-513354.5	2218	RM11	70948.5	152550	Right
S/R_8	chr11:513564-540882	27318	RM11	73376	125022	Right
S/R_8	chr11:540925-543063.5	2138.5	RM11	100737	122840	Right
S/R_8	chr11:543562-610160	66598	RM11	103374	55744	Right
S/R_8	chr11:610263.5-640113	29849.5	RM11	170076	25791	Right
S/R_8	chr11:640966.5-645162	4195.5	RM11	200778	20742	Right
S/R_8	chr12:230319.5-232713.5	2394	RM11	79431.5	218234	Left
S/R_8	chr12:414941.5-417622.5	2681	S288c	264054	402856	Left
S/R_8	chr12:815893.5-815963.5	70	S288c	665006	248318	Right
S/R_8	chr12:997651.5-1003341	5689.5	RM11	846764	60940	Right
S/R_8	chr13:428468.5-430498	2029.5	RM11	160378	422124	Left
S/R_8	chr13:874256.5-874291.5	35	S288c	606166	49249.5	Right
S/R_8	chr14:16963.5-17073	109.5	S288c	611743	9535.5	Left
S/R_8	chr14:659799-662247.5	2448.5	RM11	30983	121030	Right
S/R_8	chr14:749488-752367.5	2879.5	S288c	120672	30910.5	Right
S/R_8	chr15:11882-11977	95	S288c	314666	11035	Left
S/R_8	chr15:242022.5-244655.5	2633	RM11	81987.5	241176	Left
S/R_8	chr16:8331-17378.5	9047.5	RM11	538636	1108	Left
S/R_8	chr16:19722-97294	77572	RM11	458721	12499	Left
S/R_8	chr16:97850.5-98980.5	1130	RM11	457034	90627.5	Left
S/R_8	chr16:99079.5-99490.5	411	RM11	456524	91856.5	Left
S/R_8	chr16:99590-107626.5	8036.5	RM11	448388	92367	Left
S/R_8	chr16:107775-132808.5	25033.5	RM11	423206	100552	Left
S/R_8	chr16:132882-134674	1792	RM11	421341	125659	Left
S/R_8	chr16:337993.5-340301.5	2308	S288c	215714	330770	Left
S/R_8	chr16:436457-436473	16	S288c	119542	429234	Left
S/R_9	chr1:27363.5-27665.5	302	S288c	123858	26562.5	Left
S/R_9	chr1:29051-29398.5	347.5	S288c	122126	28250	Left
S/R_9	chr1:37162-37369.5	207.5	RM11	114154	36361	Left
S/R_9	chr1:55598-55900	302	S288c	95624	54797	Left
S/R_9	chr1:65479.5-65542	62.5	S288c	85982	64678.5	Left
S/R_9	chr1:65542-65730.5	188.5	RM11	85793.5	64741	Left
S/R_9	chr1:133260-133360.5	100.5	S288c	18163.5	96050.5	Right
S/R_9	chr1:151872-152256.5	384.5	RM11	348	77154.5	Right
S/R_9	chr1:183461-183726	265	S288c	31937	45685	Right
S/R_9	chr1:188071.5-189013.5	942	S288c	36547.5	40397.5	Right
S/R_9	chr1:197726.5-197785.5	59	S288c	46202.5	31625.5	Right
S/R_9	chr1:198143-198423	280	S288c	46619	30988	Right
S/R_9	chr2:8122.5-8199.5	77	S288c	230066	1514.5	Left
S/R_9	chr2:155665-156020	355	RM11	82245	149057	Left
S/R_9	chr2:156020-157187.5	1167.5	S288c	81077.5	149412	Left
S/R_9	chr2:168682-168739	57	RM11	69526	162074	Left
S/R_9	chr2:238174.5-238206.5	32	S288c	58.5	231566	Left
S/R_9	chr2:238206.5-238371.5	165	RM11	0	231598	Left
S/R_9	chr2:247774-247903	129	S288c	9509	241166	Left
S/R_9	chr2:329527.5-329692	164.5	S288c	91262.5	322920	Left
S/R_9	chr2:331870.5-332186	315.5	S288c	93605.5	325262	Left
S/R_9	chr2:353089-354491.5	1402.5	RM11	114824	346481	Left
S/R_9	chr2:368067.5-368835	767.5	S288c	129802	361460	Left
S/R_9	chr2:372882-373560.5	678.5	S288c	134617	366274	Left
S/R_9	chr2:417974.5-418015	40.5	S288c	179710	394364	Right
S/R_9	chr2:466697-466786	89	S288c	228432	345593	Right
S/R_9	chr2:475788.5-475922	133.5	S288c	237524	336457	Right
S/R_9	chr2:479910.5-480105.5	195	S288c	241646	332274	Right
S/R_9	chr2:528288-528643	355	S288c	290023	283736	Right
S/R_9	chr2:537997.5-538188	190.5	S288c	299732	274191	Right
S/R_9	chr2:544586-544684	98	S288c	306321	267695	Right
S/R_9	chr2:546524-546836	312	RM11	308259	265543	Right
S/R_9	chr2:562949-563188	239	S288c	324684	249191	Right
S/R_9	chr2:564295.5-564896	600.5	RM11	326030	247483	Right
S/R_9	chr2:565903-566139	236	S288c	327638	246240	Right
S/R_9	chr2:572227-573197.5	970.5	RM11	333962	239182	Right
S/R_9	chr2:592860-592955.5	95.5	RM11	354595	219424	Right
S/R_9	chr2:602450.5-602612	161.5	RM11	364186	209767	Right
S/R_9	chr2:617694.5-617988.5	294	S288c	379430	194390	Right
S/R_9	chr2:631337-631620	283	S288c	393072	180759	Right
S/R_9	chr2:654444-654988	544	RM11	416179	157391	Right
S/R_9	chr2:692781.5-692979	197.5	RM11	454516	119400	Right
S/R_9	chr2:750679-750798.5	119.5	RM11	512414	61580.5	Right
S/R_9	chr2:790264-793773	3509	S288c	551999	18606	Right
S/R_9	chr3:187793.5-188187	393.5	S288c	73350.5	127596	Right
S/R_9	chr3:254270.5-254542.5	272	RM11	139828	61240.5	Right
S/R_9	chr3:258169.5-258291	121.5	S288c	143726	57492	Right
S/R_9	chr4:25298.5-28942.5	3644	S288c	420824	24394.5	Left
S/R_9	chr4:64359.5-64683	323.5	S288c	385083	63455.5	Left
S/R_9	chr4:74648.5-74721.5	73	S288c	375044	73744.5	Left
S/R_9	chr4:122535-122593	58	S288c	327173	121631	Left
S/R_9	chr4:183741-183943.5	202.5	S288c	265822	182837	Left
S/R_9	chr4:211200.5-211335.5	135	S288c	238430	210296	Left
S/R_9	chr4:221702-221962	260	RM11	227804	220798	Left
S/R_9	chr4:223285-223660	375	RM11	226106	222381	Left
S/R_9	chr4:235988-236185.5	197.5	RM11	213580	235084	Left
S/R_9	chr4:327806.5-328821	1014.5	S288c	120945	326902	Left
S/R_9	chr4:452503.5-453279	775.5	S288c	2737.5	451600	Left
S/R_9	chr4:532647.5-538052.5	5405	S288c	82881.5	531744	Left
S/R_9	chr4:546215-546479	264	S288c	96449	545311	Left
S/R_9	chr4:740213.5-740455	241.5	RM11	290448	739310	Left
S/R_9	chr4:879287-927415.5	48128.5	RM11	429521	597210	Right
S/R_9	chr4:929781-930431	650	RM11	480015	594194	Right
S/R_9	chr4:934545-936387.5	1842.5	RM11	484779	588238	Right
S/R_9	chr4:936846-937809.5	963.5	RM11	487080	586816	Right
S/R_9	chr4:938166-946429	8263	RM11	488400	578196	Right
S/R_9	chr4:951059-962636	11577	RM11	501293	561989	Right
S/R_9	chr4:963859-986930	23071	RM11	514093	537695	Right
S/R_9	chr4:1135303.5-1138382.5	3079	RM11	685538	386242	Right
S/R_9	chr4:1151023.5-1151514	490.5	S288c	701258	373111	Right
S/R_9	chr4:1373993-1374547.5	554.5	S288c	924227	150078	Right
S/R_9	chr4:1440564.5-1441256.5	692	RM11	990798	83368.5	Right
S/R_9	chr4:1442520-1443053	533	S288c	992754	81572	Right
S/R_9	chr4:1447178-1447256.5	78.5	S288c	997412	77368.5	Right
S/R_9	chr4:1452337.5-1452486.5	149	S288c	1.00257e+06	72138.5	Right
S/R_9	chr4:1457796-1457927	131	S288c	1008030	66698	Right
S/R_9	chr4:1468641-1468801	160	S288c	1018875	55824	Right
S/R_9	chr4:1511083-1511382.5	299.5	RM11	1061317	13242.5	Right
S/R_9	chr5:13376.5-16638.5	3262	RM11	135408	6903.5	Left
S/R_9	chr5:18622.5-18964	341.5	S288c	133082	12149.5	Left
S/R_9	chr5:141089-141650	561	RM11	10396	134616	Left
S/R_9	chr5:207167.5-207204.5	37	S288c	55121.5	200694	Left
S/R_9	chr5:268742-269006	264	S288c	116696	262269	Left
S/R_9	chr5:332826.5-333207.5	381	S288c	180780	236392	Right
S/R_9	chr5:430585.5-430737	151.5	RM11	278540	138862	Right
S/R_9	chr5:491967.5-495340	3372.5	S288c	339922	74259	Right
S/R_9	chr5:503886.5-503970.5	84	S288c	351840	65628.5	Right
S/R_9	chr5:541386.5-541564	177.5	RM11	389340	28035	Right
S/R_9	chr5:550764.5-551049.5	285	RM11	398718	18549.5	Right
S/R_9	chr5:554255.5-554310	54.5	S288c	402210	15289	Right
S/R_9	chr6:16786.5-17526	739.5	S288c	131042	11256.5	Left
S/R_9	chr6:17765-17907.5	142.5	S288c	130660	12235	Left
S/R_9	chr6:18114.5-27711.5	9597	S288c	120856	12584.5	Left
S/R_9	chr6:27996.5-29655.5	1659	S288c	118912	22466.5	Left
S/R_9	chr6:29794.5-30047	252.5	S288c	118521	24264.5	Left
S/R_9	chr6:89129.5-89695	565.5	S288c	58873	83599.5	Left
S/R_9	chr6:98430-98810	380	S288c	49758	92900	Left
S/R_9	chr6:106477.5-106601	123.5	RM11	41967	100948	Left
S/R_9	chr6:146707-146976	269	S288c	1592	122755	Right
S/R_9	chr6:150350-151227	877	S288c	1782	118504	Right
S/R_9	chr6:157968.5-158058.5	90	S288c	9400.5	111672	Right
S/R_9	chr6:167406.5-167516	109.5	S288c	18838.5	102215	Right
S/R_9	chr6:229434.5-229546.5	112	RM11	80866.5	40184.5	Right
S/R_9	chr6:229779.5-229919	139.5	RM11	81211.5	39812	Right
S/R_9	chr7:10272.5-10883.5	611	S288c	486096	9491.5	Left
S/R_9	chr7:12773.5-12823	49.5	S288c	484156	11992.5	Left
S/R_9	chr7:17260.5-17263	2.5	RM11	479716	16479.5	Left
S/R_9	chr7:17823.5-17870	46.5	RM11	479109	17042.5	Left
S/R_9	chr7:89112-89891.5	779.5	RM11	407088	88331	Left
S/R_9	chr7:100977-101434	457	S288c	395545	100196	Left
S/R_9	chr7:125137.5-125237	99.5	RM11	371742	124356	Left
S/R_9	chr7:134281-134501.5	220.5	RM11	362478	133500	Left
S/R_9	chr7:151975.5-166088.5	14113	S288c	330890	151194	Left
S/R_9	chr7:166463-172171	5708	S288c	324808	165682	Left
S/R_9	chr7:208512-208661.5	149.5	S288c	288318	207731	Left
S/R_9	chr7:363318-364836.5	1518.5	S288c	132142	362537	Left
S/R_9	chr7:371761-372158.5	397.5	S288c	124820	370980	Left
S/R_9	chr7:395950-396101	151	S288c	100878	395169	Left
S/R_9	chr7:421634-423940	2306	S288c	73039	420853	Left
S/R_9	chr7:802748-802920.5	172.5	S288c	305769	280714	Right
S/R_9	chr7:807687-807851.5	164.5	S288c	310708	275784	Right
S/R_9	chr7:808069.5-808146	76.5	RM11	311090	275489	Right
S/R_9	chr7:808415-808554	139	RM11	311436	275081	Right
S/R_9	chr7:851952-852018	66	S288c	354973	231617	Right
S/R_9	chr7:875795.5-875939	143.5	RM11	378816	207696	Right
S/R_9	chr7:882480-882597.5	117.5	S288c	385501	201038	Right
S/R_9	chr7:882899.5-883907	1007.5	S288c	385920	199728	Right
S/R_9	chr7:910270.5-910332.5	62	S288c	413292	173302	Right
S/R_9	chr7:920193.5-920773	579.5	RM11	423214	162862	Right
S/R_9	chr7:986847.5-987000.5	153	S288c	489868	96634.5	Right
S/R_9	chr7:987058-987203.5	145.5	RM11	490079	96431.5	Right
S/R_9	chr7:1008950.5-1009193	242.5	RM11	511972	74442	Right
S/R_9	chr7:1050051-1050688.5	637.5	RM11	553072	32946.5	Right
S/R_9	chr7:1068735.5-1068787	51.5	S288c	571756	14848	Right
S/R_9	chr8:12692.5-12774.5	82	S288c	92869.5	7187.5	Left
S/R_9	chr8:64230-64398.5	168.5	RM11	41245.5	58725	Left
S/R_9	chr8:80364-80661.5	297.5	RM11	24982.5	74859	Left
S/R_9	chr8:82447-82539.5	92.5	S288c	23104.5	76942	Left
S/R_9	chr8:93002-93332	330	S288c	12312	87497	Left
S/R_9	chr8:132929-133123.5	194.5	S288c	27285	127424	Left
S/R_9	chr8:149595.5-149643.5	48	S288c	43951.5	144090	Left
S/R_9	chr8:154916.5-155180.5	264	RM11	49272.5	149412	Left
S/R_9	chr8:155426.5-155611	184.5	S288c	49782.5	149922	Left
S/R_9	chr8:167527.5-167566	38.5	S288c	61883.5	162022	Left
S/R_9	chr8:193024-193179.5	155.5	S288c	87380	187519	Left
S/R_9	chr8:382920.5-382998	77.5	S288c	277276	173107	Right
S/R_9	chr8:391446.5-391794	347.5	RM11	285802	164311	Right
S/R_9	chr8:429065.5-429333	267.5	RM11	323422	126772	Right
S/R_9	chr8:510967-512248.5	1281.5	S288c	405323	43856.5	Right
S/R_9	chr8:517073.5-517799	725.5	S288c	411430	38306	Right
S/R_9	chr9:26569.5-26629.5	60	S288c	329058	18785.5	Left
S/R_9	chr9:27034.5-27186.5	152	S288c	328500	19250.5	Left
S/R_9	chr9:51538.5-51826.5	288	S288c	303860	43754.5	Left
S/R_9	chr9:57365.5-57786.5	421	S288c	297900	49581.5	Left
S/R_9	chr9:62471-62664.5	193.5	S288c	293022	54687	Left
S/R_9	chr9:64507.5-65032.5	525	S288c	290654	56723.5	Left
S/R_9	chr9:65462-65616.5	154.5	RM11	290070	57678	Left
S/R_9	chr9:69643.5-69707.5	64	RM11	285980	61859.5	Left
S/R_9	chr9:98330-98518.5	188.5	S288c	257168	90546	Left
S/R_9	chr9:137681.5-138835.5	1154	RM11	216852	129898	Left
S/R_9	chr9:139342-139426	84	S288c	216261	131558	Left
S/R_9	chr9:182888-183218.5	330.5	S288c	172468	175104	Left
S/R_9	chr9:191874-192255.5	381.5	RM11	163432	184090	Left
S/R_9	chr9:203135.5-203783	647.5	RM11	151904	195352	Left
S/R_9	chr9:213771.5-214175	403.5	S288c	141512	205988	Left
S/R_9	chr9:279982-280546	564	RM11	75141	158522	Right
S/R_9	chr9:384017.5-384267	249.5	RM11	28330.5	54801	Right
S/R_9	chr9:388365-388535.5	170.5	RM11	32678	50532.5	Right
S/R_9	chr9:394183.5-394253.5	70	S288c	38496.5	44814.5	Right
S/R_9	chr9:394397-394792.5	395.5	S288c	38710	44275.5	Right
S/R_9	chr9:427758.5-427949	190.5	S288c	72071.5	11119	Right
S/R_9	chr10:12266-28246	15980	S288c	408120	4499	Left
S/R_9	chr10:28568-44681.5	16113.5	S288c	391684	20801	Left
S/R_9	chr10:45028-47686	2658	S288c	388680	37261	Left
S/R_9	chr10:48060-57296	9236	S288c	379070	40293	Left
S/R_9	chr10:57736-118232.5	60496.5	S288c	318134	49969	Left
S/R_9	chr10:118348-124583.5	6235.5	S288c	311782	110581	Left
S/R_9	chr10:124671.5-125205	533.5	S288c	311161	116904	Left
S/R_9	chr10:125271.5-161309.5	36038	S288c	275056	117504	Left
S/R_9	chr10:162277.5-254837.5	92560	S288c	181528	154510	Left
S/R_9	chr10:358174-358471.5	297.5	S288c	77894.5	350407	Left
S/R_9	chr10:366764-367425	661	S288c	68941	358997	Left
S/R_9	chr10:393355.5-393532.5	177	RM11	42833.5	351370	Right
S/R_9	chr10:410757-410986	229	RM11	25380	333916	Right
S/R_9	chr10:433860-434247.5	387.5	RM11	2118.5	310654	Right
S/R_9	chr10:487001.5-487457	455.5	RM11	50635.5	257445	Right
S/R_9	chr10:511591.5-520231	8639.5	S288c	75225.5	224671	Right
S/R_9	chr10:524886.5-525788	901.5	S288c	88520.5	219114	Right
S/R_9	chr10:527820.5-537742.5	9922	S288c	91454.5	207160	Right
S/R_9	chr10:537835-542909	5074	S288c	101469	201993	Right
S/R_9	chr10:543069.5-546833	3763.5	S288c	106704	198069	Right
S/R_9	chr10:546975.5-590324.5	43349	S288c	110610	154578	Right
S/R_9	chr10:590901-596753.5	5852.5	S288c	154535	148148	Right
S/R_9	chr10:597092-599108.5	2016.5	S288c	160726	145794	Right
S/R_9	chr10:599783.5-600441.5	658	S288c	163418	144460	Right
S/R_9	chr10:600651.5-704367.5	103716	S288c	164286	40534.5	Right
S/R_9	chr10:704480.5-726757	22276.5	S288c	268114	18145	Right
S/R_9	chr11:28384-28443	59	RM11	411745	27577	Left
S/R_9	chr11:45177-45306.5	129.5	RM11	394882	44370	Left
S/R_9	chr11:64033.5-64180.5	147	RM11	376008	63226.5	Left
S/R_9	chr11:84108.5-84223	114.5	S288c	355965	83301.5	Left
S/R_9	chr11:112613.5-113513	899.5	S288c	326675	111806	Left
S/R_9	chr11:142416.5-142657.5	241	S288c	297530	141610	Left
S/R_9	chr11:194873.5-195063.5	190	S288c	245124	194066	Left
S/R_9	chr11:202840-203189.5	349.5	S288c	236998	202033	Left
S/R_9	chr11:215005.5-215605.5	600	S288c	224582	214198	Left
S/R_9	chr11:240845.5-241172.5	327	S288c	199016	240038	Left
S/R_9	chr11:267670.5-267725	54.5	RM11	172463	266864	Left
S/R_9	chr11:355206-355717	511	S288c	84471	310187	Right
S/R_9	chr11:516878.5-517587	708.5	S288c	76690.5	148317	Right
S/R_9	chr11:556228-556563	335	RM11	116040	109341	Right
S/R_9	chr11:599912-600129	217	S288c	159724	65775	Right
S/R_9	chr11:606543.5-607155.5	612	S288c	166356	58748.5	Right
S/R_9	chr11:612690-613487	797	RM11	172502	52417	Right
S/R_9	chr11:620134.5-620169.5	35	RM11	179946	45734.5	Right
S/R_9	chr11:623512-624119.5	607.5	RM11	183324	41784.5	Right
S/R_9	chr11:645081.5-645162	80.5	S288c	204894	20742	Right
S/R_9	chr12:23694-23835.5	141.5	RM11	127052	11609	Left
S/R_9	chr12:66466.5-66830	363.5	S288c	84058	54381.5	Left
S/R_9	chr12:81636.5-82229.5	593	RM11	68658.5	69551.5	Left
S/R_9	chr12:86647.5-86929.5	282	RM11	63958.5	74562.5	Left
S/R_9	chr12:92477-92514.5	37.5	S288c	58373.5	80392	Left
S/R_9	chr12:127320.5-127482.5	162	S288c	23405.5	115236	Left
S/R_9	chr12:230319.5-232830.5	2511	S288c	79431.5	218234	Left
S/R_9	chr12:243204.5-243800	595.5	S288c	92316.5	231120	Left
S/R_9	chr12:247668.5-248113.5	445	S288c	96780.5	235584	Left
S/R_9	chr12:250497.5-250642.5	145	RM11	99609.5	238412	Left
S/R_9	chr12:262770-263009	239	RM11	111882	250685	Left
S/R_9	chr12:282447-283071.5	624.5	S288c	131559	270362	Left
S/R_9	chr12:304060.5-304838	777.5	S288c	153172	291976	Left
S/R_9	chr12:320990.5-321189	198.5	S288c	170102	308906	Left
S/R_9	chr12:382299-382482.5	183.5	S288c	231411	370214	Left
S/R_9	chr12:475551-490611.5	15060.5	S288c	324663	463466	Left
S/R_9	chr12:501473-501574.5	101.5	S288c	350585	489388	Left
S/R_9	chr12:514939-515107.5	168.5	S288c	364051	502854	Left
S/R_9	chr12:633056.5-633139.5	83	RM11	482168	431142	Right
S/R_9	chr12:633331.5-633416	84.5	RM11	482444	430865	Right
S/R_9	chr12:672929-673218	289	RM11	522041	391063	Right
S/R_9	chr12:675665.5-676018.5	353	S288c	524778	388262	Right
S/R_9	chr12:712761.5-713024.5	263	S288c	561874	351256	Right
S/R_9	chr12:718061-718238.5	177.5	S288c	567173	346042	Right
S/R_9	chr12:723016-723267.5	251.5	S288c	572128	341014	Right
S/R_9	chr12:751065-751611	546	S288c	600177	312670	Right
S/R_9	chr12:760366.5-760552.5	186	S288c	609478	303728	Right
S/R_9	chr12:790440.5-790623.5	183	RM11	639552	273658	Right
S/R_9	chr12:792623-792667.5	44.5	S288c	641735	271614	Right
S/R_9	chr12:806830.5-806948.5	118	S288c	655942	257332	Right
S/R_9	chr12:807744-807958	214	S288c	656856	256323	Right
S/R_9	chr12:809455-809623	168	S288c	658567	254658	Right
S/R_9	chr12:815837-815904	67	S288c	664949	248377	Right
S/R_9	chr12:819190.5-819595	404.5	RM11	668302	244686	Right
S/R_9	chr12:833877.5-834007	129.5	S288c	682990	230274	Right
S/R_9	chr12:849468-849560	92	RM11	698580	214721	Right
S/R_9	chr12:880143-880297.5	154.5	RM11	729255	183984	Right
S/R_9	chr12:963485-963713	228	S288c	812597	100568	Right
S/R_9	chr12:964066-964291	225	RM11	813178	99990	Right
S/R_9	chr12:965318-965394.5	76.5	RM11	814430	98886.5	Right
S/R_9	chr12:1023919.5-1024092.5	173	RM11	873032	40188.5	Right
S/R_9	chr12:1025150.5-1025321.5	171	RM11	874262	38959.5	Right
S/R_9	chr13:89440.5-89727.5	287	S288c	178362	83096.5	Left
S/R_9	chr13:90591-90991	400	S288c	177099	84247	Left
S/R_9	chr13:113972.5-114392	419.5	RM11	153698	107628	Left
S/R_9	chr13:162743-162820.5	77.5	S288c	105270	156399	Left
S/R_9	chr13:225215-225286	71	RM11	42804	218871	Left
S/R_9	chr13:226415-226743	328	S288c	41347	220071	Left
S/R_9	chr13:236394-236618	224	S288c	31472	230050	Left
S/R_9	chr13:247658.5-247792	133.5	RM11	20298	241314	Left
S/R_9	chr13:272619-272799	180	S288c	4529	266275	Left
S/R_9	chr13:365435-365684	249	S288c	97345	359091	Left
S/R_9	chr13:443164.5-443618.5	454	RM11	175074	436820	Left
S/R_9	chr13:446846-446976	130	S288c	178756	440502	Left
S/R_9	chr13:504684.5-505231	546.5	S288c	236594	418310	Right
S/R_9	chr13:584118.5-584303.5	185	RM11	316028	339238	Right
S/R_9	chr13:810692.5-816415	5722.5	RM11	542602	107126	Right
S/R_9	chr13:874022.5-874279.5	257	S288c	605932	49261.5	Right
S/R_9	chr13:906490-906614.5	124.5	RM11	638400	16926.5	Right
S/R_9	chr13:917316-917493	177	S288c	649226	6048	Right
S/R_9	chr14:17161.5-17480.5	319	S288c	611336	9733.5	Left
S/R_9	chr14:23748.5-23974	225.5	RM11	604842	16320.5	Left
S/R_9	chr14:27118-27438.5	320.5	S288c	601378	19690	Left
S/R_9	chr14:206817-206899	82	S288c	421917	199389	Left
S/R_9	chr14:208679-209008	329	RM11	419808	201251	Left
S/R_9	chr14:209008-209458	450	S288c	419358	201580	Left
S/R_9	chr14:263314-263760.5	446.5	S288c	365056	255886	Left
S/R_9	chr14:399461-400026	565	RM11	228790	383252	Right
S/R_9	chr14:403564.5-403932	367.5	RM11	224884	379346	Right
S/R_9	chr14:490486.5-494625.5	4139	S288c	134190	288652	Right
S/R_9	chr14:501664-501981	317	S288c	126835	281297	Right
S/R_9	chr14:572602-572660.5	58.5	S288c	56155.5	210618	Right
S/R_9	chr15:12910-12992.5	82.5	RM11	313650	12063	Left
S/R_9	chr15:25393.5-25684.5	291	S288c	300958	24546.5	Left
S/R_9	chr15:32275.5-32553	277.5	S288c	294090	31428.5	Left
S/R_9	chr15:35821.5-35890.5	69	RM11	290752	34974.5	Left
S/R_9	chr15:43355.5-43395.5	40	S288c	283248	42508.5	Left
S/R_9	chr15:44636-44794	158	RM11	281849	43789	Left
S/R_9	chr15:117599-120704	3105	S288c	205939	116752	Left
S/R_9	chr15:132299-132605.5	306.5	RM11	194038	131452	Left
S/R_9	chr15:143501-143771	270	S288c	182872	142654	Left
S/R_9	chr15:144062.5-144284.5	222	S288c	182358	143216	Left
S/R_9	chr15:145165-145767	602	S288c	180876	144318	Left
S/R_9	chr15:166844.5-167105.5	261	S288c	159538	165998	Left
S/R_9	chr15:167804.5-167954	149.5	S288c	158689	166958	Left
S/R_9	chr15:168136.5-168236	99.5	S288c	158407	167290	Left
S/R_9	chr15:349469-349527.5	58.5	RM11	22826	348622	Left
S/R_9	chr15:376766.5-377105.5	339	RM11	50123.5	375920	Left
S/R_9	chr15:415336-415437	101	RM11	88693	414489	Left
S/R_9	chr15:415531.5-415630	98.5	RM11	88888.5	414684	Left
S/R_9	chr15:417660.5-417836	175.5	S288c	91017.5	416814	Left
S/R_9	chr15:434164.5-435116	951.5	RM11	107522	433318	Left
S/R_9	chr15:438894.5-439011	116.5	S288c	112252	438048	Left
S/R_9	chr15:490672.5-491062	389.5	RM11	164030	489826	Left
S/R_9	chr15:514669-514726.5	57.5	S288c	188026	513822	Left
S/R_9	chr15:515121.5-515233	111.5	S288c	188478	514274	Left
S/R_9	chr15:517124.5-518523	1398.5	RM11	190482	516278	Left
S/R_9	chr15:518792-519583.5	791.5	RM11	192149	517945	Left
S/R_9	chr15:520301.5-521353.5	1052	RM11	193658	519454	Left
S/R_9	chr15:521542-521815.5	273.5	RM11	194899	520695	Left
S/R_9	chr15:522031.5-524842.5	2811	RM11	195388	521184	Left
S/R_9	chr15:525271.5-526856.5	1585	RM11	198628	524424	Left
S/R_9	chr15:536044-536310.5	266.5	S288c	209401	535197	Left
S/R_9	chr15:608589-608759	170	S288c	281946	475163	Right
S/R_9	chr15:849731-849985	254	S288c	523088	233937	Right
S/R_9	chr15:888834.5-889055	220.5	RM11	562192	194867	Right
S/R_9	chr15:970119.5-970156	36.5	S288c	643476	113766	Right
S/R_9	chr15:998073.5-998596.5	523	S288c	671430	85325.5	Right
S/R_9	chr15:1075728-1075901	173	S288c	749085	8021	Right
S/R_9	chr16:126764-126923.5	159.5	S288c	429092	119541	Left
S/R_9	chr16:173620.5-173843.5	223	RM11	382172	166398	Left
S/R_9	chr16:180000-181681.5	1681.5	RM11	374334	172777	Left
S/R_9	chr16:282295-282406.5	111.5	RM11	273608	275072	Left
S/R_9	chr16:367253-368115	862	S288c	187900	360030	Left
S/R_9	chr16:377042.5-377492	449.5	S288c	178523	369820	Left
S/R_9	chr16:430021-430163.5	142.5	S288c	125852	422798	Left
S/R_9	chr16:462113-462241.5	128.5	S288c	93773.5	454890	Left
S/R_9	chr16:491251.5-491673.5	422	RM11	64341.5	450722	Right
S/R_9	chr16:510688-510794.5	106.5	S288c	45220.5	431602	Right
S/R_9	chr16:547205.5-549416	2210.5	S288c	6599	392980	Right
S/R_9	chr16:726034-726447	413	RM11	170019	215949	Right
S/R_9	chr16:837725.5-839150.5	1425	S288c	281710	103246	Right
S/R_9	chr16:920355-920678	323	S288c	364340	21718	Right
S/R_9	chr16:920850.5-920923.5	73	S288c	364836	21472.5	Right
S/R_9	chr16:938875.5-940509	1633.5	RM11	382860	1887	Right
S/R_10	chr1:2420.5-14830	12409.5	S288c	136694	1619.5	Left
S/R_10	chr1:30828.5-30916	87.5	S288c	120608	30027.5	Left
S/R_10	chr1:151699-152119.5	420.5	S288c	175	77291.5	Right
S/R_10	chr1:198548-200769	2221	S288c	47024	28642	Right
S/R_10	chr2:113550.5-124383.5	10833	RM11	113882	106942	Left
S/R_10	chr2:238206.5-238371.5	165	S288c	0	231598	Left
S/R_10	chr2:498897-498984.5	87.5	S288c	260632	313394	Right
S/R_10	chr2:553533-553753	220	RM11	315268	258626	Right
S/R_10	chr2:637861.5-638038	176.5	RM11	399596	174341	Right
S/R_10	chr2:681451-681816.5	365.5	S288c	443186	130562	Right
S/R_10	chr3:8982.5-13967.5	4985	S288c	100476	7884.5	Left
S/R_10	chr3:71932.5-74858.5	2926	S288c	39584.5	70834.5	Left
S/R_10	chr4:538153.5-538524.5	371	S288c	88387.5	537250	Left
S/R_10	chr4:1447256.5-1447305	48.5	S288c	997490	77320	Right
S/R_10	chr5:7055-7152	97	S288c	144894	582	Left
S/R_10	chr5:19542.5-21296	1753.5	S288c	130750	13069.5	Left
S/R_10	chr5:437046.5-500623.5	63577	S288c	285000	68975.5	Right
S/R_10	chr5:501068-504608	3540	S288c	349022	64991	Right
S/R_10	chr5:504717-526658	21941	S288c	352671	42941	Right
S/R_10	chr5:526952-563157.5	36205.5	S288c	374906	6441.5	Right
S/R_10	chr5:563393-565978	2585	S288c	411347	3621	Right
S/R_10	chr5:566107-569094.5	2987.5	S288c	414061	504.5	Right
S/R_10	chr6:31563.5-31658.5	95	S288c	116910	26033.5	Left
S/R_10	chr6:87827.5-88007.5	180	S288c	60560.5	82297.5	Left
S/R_10	chr6:148559.5-148926	366.5	S288c	0	120805	Right
S/R_10	chr6:167733-167942	209	S288c	19165	101789	Right
S/R_10	chr7:12316-12416	100	S288c	484563	11535	Left
S/R_10	chr7:17820.5-17925	104.5	S288c	479054	17039.5	Left
S/R_10	chr7:196893.5-197065.5	172	S288c	299914	196112	Left
S/R_10	chr7:203901-204049.5	148.5	RM11	292930	203120	Left
S/R_10	chr7:431290-431674	384	RM11	65305	430509	Left
S/R_10	chr7:876509.5-876643	133.5	RM11	379530	206992	Right
S/R_10	chr7:989677.5-990103	425.5	S288c	492698	93532	Right
S/R_10	chr7:995320.5-995449	128.5	S288c	498342	88186	Right
S/R_10	chr7:1068735.5-1068787	51.5	S288c	571756	14848	Right
S/R_10	chr8:12740-12797	57	S288c	92847	7235	Left
S/R_10	chr8:93708.5-93797	88.5	S288c	11847	88203.5	Left
S/R_10	chr8:398801.5-399150.5	349	S288c	293158	156954	Right
S/R_10	chr9:79804-79921	117	S288c	275766	72020	Left
S/R_10	chr9:245982-246136.5	154.5	RM11	109550	192932	Right
S/R_10	chr9:247455.5-247539.5	84	S288c	108148	191528	Right
S/R_10	chr9:427758.5-427949	190.5	S288c	72071.5	11119	Right
S/R_10	chr10:114728-115028	300	S288c	321338	106961	Left
S/R_10	chr10:160246-160337	91	S288c	276029	152479	Left
S/R_10	chr11:46780.5-46881	100.5	S288c	393307	45973.5	Left
S/R_10	chr11:97698-97827.5	129.5	RM11	342360	96891	Left
S/R_10	chr11:232766-232879	113	RM11	207309	231959	Left
S/R_10	chr11:233844-234338.5	494.5	RM11	205850	233037	Left
S/R_10	chr11:316218-316292	74	S288c	123896	315411	Left
S/R_10	chr11:617501.5-617748.5	247	S288c	177314	48155.5	Right
S/R_10	chr12:64065-64357.5	292.5	S288c	86530.5	51980	Left
S/R_10	chr12:243534-243800	266	RM11	92646	231449	Left
S/R_10	chr12:673305.5-673444	138.5	S288c	522418	390837	Right
S/R_10	chr12:712761.5-713024.5	263	S288c	561874	351256	Right
S/R_10	chr12:792623-792667.5	44.5	S288c	641735	271614	Right
S/R_10	chr12:807655.5-807744	88.5	RM11	656768	256537	Right
S/R_10	chr12:871911.5-872018	106.5	S288c	721024	192263	Right
S/R_10	chr13:97680.5-97930.5	250	RM11	170160	91336.5	Left
S/R_10	chr13:162764-162871.5	107.5	S288c	105218	156420	Left
S/R_10	chr13:511752.5-511867	114.5	S288c	243662	411674	Right
S/R_10	chr13:512028.5-512175	146.5	S288c	243938	411366	Right
S/R_10	chr13:514159-514268.5	109.5	RM11	246069	409272	Right
S/R_10	chr13:628738-628901.5	163.5	RM11	360648	294640	Right
S/R_10	chr14:561059.5-561137	77.5	S288c	67679	222141	Right
S/R_10	chr14:730881-731156	275	RM11	102065	52122	Right
S/R_10	chr14:731313.5-752367.5	21054	RM11	102498	30910.5	Right
S/R_10	chr14:753347.5-778347	24999.5	RM11	124532	4931	Right
S/R_10	chr15:11900.5-11949.5	49	S288c	314694	11053.5	Left
S/R_10	chr15:19296.5-19423.5	127	RM11	307220	18449.5	Left
S/R_10	chr15:25228.5-25330	101.5	S288c	301313	24381.5	Left
S/R_10	chr15:43280-43363	83	S288c	283280	42433	Left
S/R_10	chr15:108760.5-109028	267.5	S288c	217615	107914	Left
S/R_10	chr15:117599-120704	3105	S288c	205939	116752	Left
S/R_10	chr15:340663-340852.5	189.5	S288c	14020	339816	Left
S/R_10	chr15:372132.5-372312	179.5	RM11	45489.5	371286	Left
S/R_10	chr15:384753.5-384827.5	74	S288c	58110.5	383906	Left
S/R_10	chr15:385548-385678.5	130.5	S288c	58905	384701	Left
S/R_10	chr15:436760-436975	215	RM11	110117	435913	Left
S/R_10	chr15:514994-515085.5	91.5	S288c	188351	514147	Left
S/R_10	chr15:888834.5-889055	220.5	RM11	562192	194867	Right
S/R_10	chr15:970119.5-970156	36.5	S288c	643476	113766	Right
S/R_10	chr16:572098-572363.5	265.5	S288c	16083	370032	Right
